# Supplementary material for: Protist–Lactic Acid Bacteria Co-Culture as a Strategy to Bioaccumulate Polyunsaturated Fatty Acids in the Protist Aurantiochytrium sp. T66
Source: MDPI journal article supplement (doi:10.3390/md21030142), 2023-02-23
Supplement: s1 [file s1]

# Supplementary material

**Table. S1** – Total variance explained of PCA analysis (Figure 3)

| Component | 96 h       |          |            | 144 h      |          |            |
|-----------|------------|----------|------------|------------|----------|------------|
|           | Eigenvalue | % of     | %          | Eigenvalue | % of     | %          |
|           | total      | variance | cumulative | total      | variance | cumulative |
| 1         | 4.9        | 44.8     | 44.8       | 4.9        | 44.6     | 44.6       |
| 2         | 3.7        | 33.5     | 78.3       | 3.1        | 28.2     | 72.8       |
| 3         | 1.4        | 12.8     | 91.1       | 1.4        | 12.6     | 85.5       |

**Table S2.** Total lipids, total SAFA and Total MUfa content (mg g<sup>-1</sup> biomass)

| T       | Item  | Total Lipids (mg·g <sup>-1</sup> biomass) |                      | Total SAFA (mg·g <sup>-1</sup> biomass) |                      | Total MUFA (mg·g <sup>-1</sup> biomass) |                     |
|---------|-------|-------------------------------------------|----------------------|-----------------------------------------|----------------------|-----------------------------------------|---------------------|
|         |       | 96 h                                      | 144 h                | 96 h                                    | 144 h                | 96 h                                    | 144 h               |
| Control | Au    | 202.4 ± 6.4                               | 245.7 ± 7.9          | 189.1 ± 5.3                             | 234.0 ± 7.8          | 3.3 ± 1.6                               | 2.8 ± 0.4           |
| 0 h     | B6    | <b>35.0 ± 10.0 *</b>                      | <b>30.4 ± 5.6 *</b>  | <b>12.9 ± 5.1 *</b>                     | <b>9.8 ± 2.8 *</b>   | <b>21.2 ± 1.4 *</b>                     | <b>13.8 ± 3.1 *</b> |
|         | K4.5  | <b>74.4 ± 8.0 *</b>                       | <b>44.9 ± 2.8 *</b>  | <b>30.0 ± 4.8 *</b>                     | <b>20.5 ± 2.0 *</b>  | <b>15.7 ± 0.8 *</b>                     | <b>12.8 ± 1.6 *</b> |
|         | K6.10 | <b>67.6 ± 3.9 *</b>                       | <b>54.5 ± 13.0 *</b> | <b>31.2 ± 1.9 *</b>                     | <b>25.3 ± 3.1 *</b>  | <b>17.7 ± 1.9 *</b>                     | 8.2 ± 1.5           |
| 24 h    | B6    | <b>86.0 ± 11.7 *</b>                      | <b>65.6 ± 6.2 *</b>  | <b>50.2 ± 10.8 *</b>                    | <b>42.7 ± 7.4 *</b>  | 12.9 ± 1.8                              | 9.4 ± 3.0           |
|         | K4.5  | <b>68.4 ± 4.7 *</b>                       | <b>35.9 ± 1.3 *</b>  | <b>32.1 ± 1.4 *</b>                     | <b>14.9 ± 1.1 *</b>  | 14.0 ± 0.6                              | <b>12.5 ± 2.2 *</b> |
|         | K6.10 | <b>79.1 ± 9.4 *</b>                       | <b>54.4 ± 15.0 *</b> | <b>41.1 ± 5.5 *</b>                     | <b>28.9 ± 9.5 *</b>  | 12.0 ± 1.2                              | <b>11.5 ± 3.4 *</b> |
| 72 h    | B6    | <b>91.4 ± 17.4 *</b>                      | <b>48.3 ± 2.5 *</b>  | <b>54.0 ± 12.2 *</b>                    | <b>27.8 ± 7.1 *</b>  | 11.8 ± 2.5                              | <b>12.3 ± 1.8 *</b> |
|         | K4.5  | <b>115.6 ± 21.9 *</b>                     | <b>47.1 ± 1.9 *</b>  | <b>73.3 ± 16.8 *</b>                    | <b>25.4 ± 0.7 *</b>  | 12.4 ± 3.2                              | 7.8 ± 0.4           |
|         | K6.10 | <b>102.1 ± 14.8 *</b>                     | <b>84.5 ± 14.7 *</b> | <b>67.4 ± 10.4 *</b>                    | <b>45.8 ± 11.6 *</b> | 12.4 ± 2.5                              | 7.8 ± 1.5           |

**Au:** *Aurantiochytrium* sp. T66 (control); **B6:** Co-culture between *Aurantiochytrium* sp. T66 and *Azospirillum brasilensis* B6 (reference); **K4.5:** Co-culture between *Aurantiochytrium* sp. T66 and *Schleiferilactobacillus harbinensis* K4.5; **K6.10:** Co-culture between *Aurantiochytrium* sp. T66 and *Lentilactobacillus kefir* K6.10; **T:** Inoculation time of the bacteria in the culture of *Aurantiochytrium* sp. T66. \* in bold represents the significant differences with respect to the control (Au) with p-values < 0.05. Values indicate means ± SD.

**Table S3.** Lipid content (%) and fatty acid profile (% of total fatty acid) co-cultivation assay at 96 and 144 h after initiation of culture.

|                |                           | 96 h         |              |              |              |              |              |              |              |              | 144 h        |              |              |              |              |              |              |              |              |              |              |
|----------------|---------------------------|--------------|--------------|--------------|--------------|--------------|--------------|--------------|--------------|--------------|--------------|--------------|--------------|--------------|--------------|--------------|--------------|--------------|--------------|--------------|--------------|
|                |                           | T1           |              |              | T2           |              |              | T3           |              |              | T1           |              |              | T2           |              |              | T3           |              |              |              |              |
|                |                           | Au           | B6           | K4.5         | K6.10        | B6           | K4.5         | K6.10        | B6           | K4.5         | K6.10        | Au           | B6           | K4.5         | K6.10        | B6           | K4.5         | K6.10        | B6           | K4.5         | K6.10        |
| % Total lipids |                           | 20,24 ± 0,64 | 3,50 ± 1,00  | 6,73 ± 0,99  | 6,14 ± 0,93  | 8,60 ± 1,17  | 8,06 ± 1,48  | 7,63 ± 1,32  | 8,74 ± 2,40  | 10,32 ± 3,31 | 9,36 ± 0,87  | 24,90 ± 1,09 | 3,23 ± 1,30  | 4,84 ± 1,50  | 5,72 ± 2,01  | 7,25 ± 2,24  | 3,16 ± 0,72  | 7,70 ± 3,19  | 6,65 ± 3,37  | 4,71 ± 0,19  | 9,15 ± 2,88  |
| C4:0           | Butanoic acid             | 0,00 ± 0,00  | 0,00 ± 0,00  | 0,00 ± 0,00  | 0,00 ± 0,00  | 0,00 ± 0,00  | 0,01 ± 0,02  | 0,11 ± 0,08  | 0,00 ± 0,00  | 0,00 ± 0,00  | 0,00 ± 0,00  | 0,00 ± 0,00  | 0,00 ± 0,00  | 0,00 ± 0,00  | 0,00 ± 0,00  | 0,00 ± 0,00  | 0,00 ± 0,00  | 0,00 ± 0,00  | 0,00 ± 0,00  | 0,00 ± 0,00  | 0,00 ± 0,00  |
| C6:0           | Caproic acid              | 0,00 ± 0,00  | 0,00 ± 0,00  | 0,00 ± 0,00  | 0,00 ± 0,00  | 0,00 ± 0,00  | 0,00 ± 0,00  | 0,00 ± 0,00  | 0,00 ± 0,00  | 0,00 ± 0,00  | 0,00 ± 0,00  | 0,02 ± 0,01  | 0,00 ± 0,00  | 0,00 ± 0,00  | 0,00 ± 0,00  | 0,00 ± 0,00  | 0,00 ± 0,00  | 0,00 ± 0,00  | 0,00 ± 0,00  | 0,00 ± 0,00  | 0,00 ± 0,00  |
| C8:0           | Caprylic acid             | 0,00 ± 0,00  | 0,00 ± 0,00  | 0,00 ± 0,00  | 0,00 ± 0,00  | 0,00 ± 0,00  | 0,00 ± 0,00  | 0,00 ± 0,00  | 0,00 ± 0,00  | 0,00 ± 0,00  | 0,00 ± 0,00  | 0,02 ± 0,01  | 0,00 ± 0,00  | 0,00 ± 0,00  | 0,00 ± 0,00  | 0,00 ± 0,00  | 0,00 ± 0,00  | 0,00 ± 0,00  | 0,00 ± 0,00  | 0,00 ± 0,00  | 0,00 ± 0,00  |
| C10:0          | Capric Acid               | 0,00 ± 0,00  | 0,10 ± 0,17  | 0,00 ± 0,00  | 0,00 ± 0,00  | 0,00 ± 0,00  | 0,01 ± 0,02  | 0,00 ± 0,00  | 0,00 ± 0,00  | 0,00 ± 0,00  | 0,00 ± 0,00  | 0,03 ± 0,00  | 0,26 ± 0,24  | 0,00 ± 0,00  | 0,02 ± 0,04  | 0,00 ± 0,00  | 0,02 ± 0,03  | 0,01 ± 0,01  | 0,00 ± 0,00  | 0,06 ± 0,06  | 0,00 ± 0,01  |
| C11:0          | Undecanoic acid           | 0,03 ± 0,04  | 0,07 ± 0,12  | 0,00 ± 0,00  | 0,00 ± 0,00  | 0,00 ± 0,00  | 0,01 ± 0,01  | 0,00 ± 0,00  | 0,00 ± 0,00  | 0,03 ± 0,05  | 0,00 ± 0,00  | 0,12 ± 0,01  | 0,00 ± 0,00  | 0,00 ± 0,00  | 0,00 ± 0,00  | 0,00 ± 0,00  | 0,00 ± 0,00  | 0,01 ± 0,02  | 0,00 ± 0,00  | 0,00 ± 0,00  | 0,02 ± 0,02  |
| C12:0          | Lauric Acid               | 0,36 ± 0,33  | 0,76 ± 0,36  | 0,12 ± 0,06  | 0,51 ± 0,43  | 0,21 ± 0,09  | 0,18 ± 0,05  | 0,18 ± 0,04  | 0,23 ± 0,01  | 0,41 ± 0,18  | 0,25 ± 0,08  | 0,29 ± 0,03  | 2,23 ± 1,43  | 0,56 ± 0,36  | 0,32 ± 0,23  | 0,39 ± 0,21  | 0,85 ± 0,32  | 0,68 ± 0,44  | 0,73 ± 0,32  | 0,43 ± 0,14  | 0,34 ± 0,08  |
| C13:0          | Tridecanoic acid          | 0,76 ± 0,26  | 0,12 ± 0,20  | 0,10 ± 0,05  | 0,12 ± 0,02  | 0,43 ± 0,34  | 0,28 ± 0,19  | 0,66 ± 0,47  | 0,47 ± 0,31  | 0,51 ± 0,12  | 0,76 ± 0,21  | 2,28 ± 0,07  | 0,00 ± 0,00  | 0,24 ± 0,10  | 0,06 ± 0,11  | 0,44 ± 0,12  | 0,00 ± 0,00  | 0,39 ± 0,31  | 0,25 ± 0,19  | 0,40 ± 0,04  | 0,64 ± 0,46  |
| C14:0          | Myristic acid             | 8,48 ± 0,55  | 2,15 ± 0,60  | 2,59 ± 0,38  | 3,10 ± 0,58  | 4,73 ± 0,19  | 3,82 ± 0,90  | 4,96 ± 0,80  | 6,74 ± 1,08  | 4,52 ± 0,18  | 5,77 ± 0,71  | 7,11 ± 0,29  | 2,15 ± 0,84  | 3,23 ± 0,26  | 2,69 ± 1,41  | 5,44 ± 1,40  | 2,48 ± 0,57  | 4,78 ± 0,76  | 4,53 ± 0,40  | 5,79 ± 0,64  | 3,77 ± 0,16  |
| C15:0          | Pentadecanoic Acid        | 27,02 ± 1,25 | 2,38 ± 0,42  | 5,69 ± 1,09  | 5,92 ± 0,43  | 11,94 ± 7,08 | 8,87 ± 3,15  | 11,22 ± 1,01 | 9,24 ± 1,53  | 10,86 ± 0,99 | 16,43 ± 1,51 | 47,90 ± 1,28 | 3,52 ± 1,77  | 8,09 ± 1,91  | 5,83 ± 0,97  | 13,17 ± 5,14 | 4,11 ± 0,56  | 6,73 ± 0,34  | 8,69 ± 6,28  | 10,11 ± 0,96 | 10,75 ± 0,90 |
| C16:0          | palmitic acid             | 46,08 ± 2,41 | 19,10 ± 1,64 | 24,55 ± 0,58 | 26,55 ± 0,74 | 32,72 ± 4,29 | 26,59 ± 0,41 | 27,17 ± 1,39 | 33,65 ± 1,90 | 33,22 ± 0,67 | 32,35 ± 0,57 | 26,16 ± 1,91 | 15,70 ± 3,35 | 25,87 ± 3,70 | 29,46 ± 2,77 | 36,40 ± 4,05 | 25,62 ± 3,10 | 29,91 ± 0,83 | 33,96 ± 2,71 | 29,13 ± 1,56 | 26,38 ± 0,91 |
| C17:0          | heptadecanoic acid        | 7,81 ± 0,29  | 1,32 ± 0,27  | 2,84 ± 0,36  | 3,14 ± 0,10  | 4,18 ± 1,94  | 3,58 ± 0,73  | 3,68 ± 0,46  | 3,63 ± 0,55  | 10,24 ± 1,20 | 7,04 ± 1,62  | 9,44 ± 3,17  | 1,83 ± 0,52  | 3,51 ± 0,42  | 3,19 ± 0,08  | 5,09 ± 2,80  | 2,90 ± 0,03  | 5,56 ± 3,60  | 4,24 ± 2,64  | 3,36 ± 0,92  | 6,20 ± 1,20  |
| C18:0          | Stearic acid              | 2,50 ± 0,08  | 8,89 ± 0,54  | 3,05 ± 0,33  | 5,65 ± 2,22  | 2,52 ± 0,46  | 2,52 ± 0,52  | 2,66 ± 0,31  | 2,76 ± 0,40  | 1,98 ± 0,36  | 2,31 ± 0,32  | 1,47 ± 0,32  | 6,12 ± 2,98  | 2,87 ± 0,21  | 4,19 ± 1,18  | 2,93 ± 0,29  | 4,57 ± 0,50  | 3,11 ± 0,63  | 3,36 ± 0,38  | 3,01 ± 0,21  | 3,69 ± 2,39  |
| C20:0          | Arachidic Acid            | 0,12 ± 0,00  | 0,77 ± 0,25  | 0,07 ± 0,08  | 0,17 ± 0,16  | 0,21 ± 0,18  | 0,05 ± 0,04  | 0,07 ± 0,03  | 0,08 ± 0,09  | 0,03 ± 0,04  | 0,04 ± 0,04  | 0,09 ± 0,02  | 0,29 ± 0,10  | 0,18 ± 0,15  | 0,32 ± 0,02  | 0,16 ± 0,04  | 0,19 ± 0,17  | 0,18 ± 0,12  | 0,19 ± 0,16  | 0,14 ± 0,15  | 0,04 ± 0,03  |
| C21:0          | Heicosenoic acid          | 0,00 ± 0,00  | 0,00 ± 0,00  | 0,12 ± 0,03  | 0,09 ± 0,09  | 0,07 ± 0,04  | 0,07 ± 0,04  | 0,13 ± 0,07  | 0,19 ± 0,13  | 0,13 ± 0,05  | 0,07 ± 0,06  | 0,07 ± 0,01  | 0,00 ± 0,00  | 0,09 ± 0,08  | 0,00 ± 0,00  | 0,04 ± 0,03  | 0,00 ± 0,00  | 0,12 ± 0,07  | 0,10 ± 0,09  | 0,16 ± 0,09  | 0,18 ± 0,07  |
| C22:0          | Behenic acid              | 0,10 ± 0,04  | 0,13 ± 0,23  | 0,31 ± 0,04  | 0,27 ± 0,14  | 0,29 ± 0,07  | 0,28 ± 0,04  | 0,25 ± 0,03  | 0,44 ± 0,13  | 0,10 ± 0,17  | 0,00 ± 0,00  | 0,06 ± 0,03  | 0,00 ± 0,00  | 0,25 ± 0,08  | 0,31 ± 0,02  | 0,21 ± 0,02  | 0,23 ± 0,17  | 0,32 ± 0,04  | 0,31 ± 0,07  | 0,37 ± 0,08  | 0,46 ± 0,04  |
| C23:0          | Tricosanoic Acid          | 0,05 ± 0,08  | 0,00 ± 0,00  | 0,57 ± 0,12  | 0,45 ± 0,22  | 0,61 ± 0,24  | 0,57 ± 0,28  | 0,45 ± 0,31  | 1,16 ± 0,42  | 0,58 ± 0,01  | 0,70 ± 0,12  | 0,05 ± 0,03  | 0,21 ± 0,11  | 0,48 ± 0,13  | 0,33 ± 0,05  | 0,46 ± 0,15  | 0,52 ± 0,14  | 0,64 ± 0,14  | 0,69 ± 0,08  | 0,67 ± 0,14  | 0,88 ± 0,07  |
| C24:0          | Lignoceric Acid           | 0,15 ± 0,09  | 0,43 ± 0,15  | 0,14 ± 0,02  | 0,23 ± 0,04  | 0,11 ± 0,03  | 0,28 ± 0,04  | 0,37 ± 0,16  | 0,29 ± 0,06  | 0,51 ± 0,17  | 0,26 ± 0,04  | 0,14 ± 0,02  | 0,68 ± 0,45  | 0,11 ± 0,06  | 0,28 ± 0,01  | 0,18 ± 0,04  | 0,29 ± 0,20  | 0,17 ± 0,09  | 0,21 ± 0,11  | 0,30 ± 0,05  | 0,35 ± 0,16  |
| C14:1          | Myristoleic acid          | 0,04 ± 0,06  | 25,82 ± 0,86 | 12,72 ± 1,05 | 15,88 ± 1,47 | 9,06 ± 1,92  | 9,82 ± 2,79  | 9,46 ± 1,04  | 6,22 ± 0,43  | 5,61 ± 1,51  | 5,80 ± 1,10  | 0,06 ± 0,01  | 33,24 ± ###  | 17,86 ± 2,46 | 10,44 ± 1,54 | 8,26 ± 3,75  | 21,26 ± 3,40 | 12,49 ± 0,69 | 11,87 ± 7,37 | 9,33 ± 0,64  | 5,51 ± 0,35  |
| C15:1          | Cis-10-Pentadecenoic acid | 0,05 ± 0,07  | 5,78 ± 1,76  | 2,68 ± 0,57  | 3,29 ± 0,69  | 1,12 ± 0,10  | 1,94 ± 0,99  | 1,15 ± 0,07  | 1,30 ± 0,05  | 1,11 ± 0,17  | 1,20 ± 0,36  | 0,17 ± 0,03  | 6,16 ± 2,15  | 4,16 ± 0,99  | 3,70 ± 2,32  | 1,62 ± 0,77  | 4,97 ± 0,56  | 2,57 ± 0,11  | 2,31 ± 1,71  | 2,02 ± 0,80  | 0,61 ± 0,07  |
| C16:1          | Palmitoleic acid          | 0,23 ± 0,15  | 9,65 ± 3,22  | 3,48 ± 0,42  | 4,42 ± 0,40  | 2,29 ± 0,60  | 2,94 ± 0,83  | 2,88 ± 0,48  | 2,01 ± 0,56  | 2,34 ± 0,89  | 1,94 ± 0,22  | 0,21 ± 0,02  | 9,42 ± 2,24  | 4,29 ± 1,18  | 3,89 ± 2,16  | 1,95 ± 1,22  | 5,27 ± 0,67  | 3,60 ± 0,24  | 3,26 ± 2,28  | 2,32 ± 0,46  | 1,54 ± 0,12  |
| C17:1          | Cis-10-Heptadecenoic acid | 0,09 ± 0,13  | 1,08 ± 0,32  | 0,52 ± 0,10  | 0,57 ± 0,13  | 0,33 ± 0,07  | 0,46 ± 0,03  | 0,28 ± 0,00  | 0,52 ± 0,13  | 0,57 ± 0,36  | 0,55 ± 0,09  | 0,28 ± 0,04  | 0,90 ± 0,05  | 0,59 ± 0,15  | 0,65 ± 0,22  | 0,33 ± 0,16  | 0,87 ± 0,11  | 0,59 ± 0,08  | 0,50 ± 0,18  | 0,57 ± 0,11  | 0,40 ± 0,10  |
| C18:1n9t       | Elaidic Acid              | 0,44 ± 0,62  | 1,83 ± 2,26  | 0,18 ± 0,01  | 0,48 ± 0,32  | 0,27 ± 0,04  | 0,47 ± 0,20  | 0,29 ± 0,14  | 0,82 ± 0,73  | 0,46 ± 0,23  | 0,83 ± 0,26  | 0,09 ± 0,04  | 1,87 ± 1,42  | 0,24 ± 0,14  | 0,37 ± 0,01  | 1,02 ± 0,90  | 0,52 ± 0,12  | 0,31 ± 0,09  | 0,41 ± 0,08  | 0,95 ± 0,79  | 0,22 ± 0,05  |
| C18:1n9c       | Oleic acid                | 0,38 ± 0,22  | 7,13 ± 2,69  | 0,94 ± 0,27  | 1,19 ± 0,52  | 1,53 ± 0,55  | 1,04 ± 0,17  | 0,72 ± 0,02  | 1,32 ± 0,53  | 1,17 ± 0,55  | 1,32 ± 0,59  | 0,16 ± 0,05  | 3,07 ± 0,02  | 0,95 ± 0,34  | 1,21 ± 0,05  | 1,17 ± 0,30  | 1,58 ± 1,20  | 1,11 ± 0,17  | 1,23 ± 0,27  | 1,16 ± 0,19  | 0,59 ± 0,18  |
| C20:1n9        | Cis-11-Eicosenoic Acid    | 0,14 ± 0,19  | 0,00 ± 0,00  | 0,00 ± 0,00  | 0,00 ± 0,00  | 0,04 ± 0,00  | 0,02 ± 0,03  | 0,05 ± 0,05  | 0,03 ± 0,05  | 0,03 ± 0,04  | 0,03 ± 0,05  | 0,02 ± 0,01  | 1,07 ± 0,69  | 0,02 ± 0,03  | 0,00 ± 0,00  | 0,00 ± 0,00  | 0,00 ± 0,00  | 0,00 ± 0,00  | 0,04 ± 0,07  | 0,03 ± 0,04  |              |
| C22:1n9        | Erucic acid               | 0,19 ± 0,15  | 1,18 ± 0,36  | 0,42 ± 0,11  | 0,13 ± 0,13  | 0,36 ± 0,03  | 0,34 ± 0,09  | 0,21 ± 0,19  | 0,39 ± 0,14  | 0,33 ± 0,14  | 0,19 ± 0,04  | 0,09 ± 0,03  | 0,52 ± 0,33  | 0,31 ± 0,05  | 0,32 ± 0,03  | 0,07 ± 0,07  | 0,02 ± 0,04  | 0,08 ± 0,09  | 0,00 ± 0,00  | 0,05 ± 0,08  | 0,02 ± 0,02  |
| C24:1n9        | Nervonic acid             | 0,10 ± 0,05  | 0,18 ± 0,16  | 0,33 ± 0,11  | 0,25 ± 0,07  | 0,19 ± 0,05  | 0,15 ± 0,13  | 0,13 ± 0,08  | 0,17 ± 0,05  | 0,17 ± 0,03  | 0,21 ± 0,08  | 0,06 ± 0,04  | 0,30 ± 0,13  | 0,19 ± 0,00  | 0,26 ± 0,03  | 0,13 ± 0,06  | 0,35 ± 0,27  | 0,24 ± 0,03  | 0,20 ± 0,08  | 0,17 ± 0,04  | 0,34 ± 0,09  |
| C18:2n6t       | Linolelaidic Acid         | 0,23 ± 0,02  | 0,83 ± 0,45  | 0,17 ± 0,02  | 0,21 ± 0,02  | 0,28 ± 0,10  | 0,22 ± 0,05  | 0,29 ± 0,16  | 0,24 ± 0,17  | 0,42 ± 0,44  | 0,27 ± 0,07  | 0,54 ± 0,02  | 0,79 ± 0,07  | 0,16 ± 0,02  | 0,26 ± 0,06  | 0,21 ± 0,08  | 0,30 ± 0,15  | 0,29 ± 0,16  | 0,27 ± 0,12  | 0,27 ± 0,11  | 0,49 ± 0,36  |
| C18:2n6c       | Linoleic acid             | 0,14 ± 0,01  | 1,01 ± 0,40  | 0,20 ± 0,00  | 0,26 ± 0,13  | 0,29 ± 0,17  | 0,26 ± 0,13  | 0,19 ± 0,06  | 0,21 ± 0,04  | 0,24 ± 0,03  | 0,10 ± 0,02  | 0,06 ± 0,02  | 0,47 ± 0,22  | 0,20 ± 0,05  | 0,24 ± 0,02  | 0,14 ± 0,08  | 0,36 ± 0,13  | 0,17 ± 0,03  | 0,20 ± 0,08  | 0,18 ± 0,03  | 0,16 ± 0,04  |
| C18:3n3        | Linolenic Acid            | 0,00 ± 0,00  | 0,10 ± 0,17  | 0,05 ± 0,01  | 0,04 ± 0,07  | 0,07 ± 0,01  | 0,06 ± 0,03  | 0,07 ± 0,01  | 0,08 ± 0,03  | 0,16 ± 0,21  | 0,03 ± 0,05  | 0,01 ± 0,01  | 0,00 ± 0,00  | 0,02 ± 0,03  | 0,00 ± 0,00  | 0,00 ± 0,00  | 0,00 ± 0,00  | 0,03 ± 0,05  | 0,03 ± 0,05  | 0,06 ± 0,05  | 0,08 ± 0,03  |
| C18:3n6        | g-linolenic acid          | 0,06 ± 0,08  | 0,00 ± 0,00  | 0,26 ± 0,09  | 0,19 ± 0,20  | 0,13 ± 0,16  | 0,25 ± 0,02  | 0,27 ± 0,03  | 0,34 ± 0,06  | 0,31 ± 0,08  | 0,22 ± 0,04  | 0,01 ± 0,01  | 0,55 ± 0,54  | 0,09 ± 0,15  | 0,00 ± 0,00  | 0,06 ± 0,06  | 0,03 ± 0,05  | 0,10 ± 0,14  | 0,12 ± 0,21  | 0,32 ± 0,13  | 0,35 ± 0,02  |
| C20:2          | Eicosadienoic Acid        | 0,30 ± 0,42  | 1,34 ± 2,33  | 0,01 ± 0,02  | 0,17 ± 0,14  | 0,07 ± 0,08  | 0,12 ± 0,16  | 0,13 ± 0,10  | 0,08 ± 0,09  | 0,30 ± 0,20  | 0,25 ± 0,11  | 0,04 ± 0,03  | 1,45 ± 0,81  | 0,18 ± 0,07  | 0,12 ± 0,12  | 0,07 ± 0,11  | 0,00 ± 0,00  | 0,01 ± 0,02  | 0,00 ± 0,00  | 0,15 ± 0,16  | 0,09 ± 0,08  |
| C20:3n3        | Eicosatrienoic Acid       | 0,00 ± 0,00  | 0,18 ± 0,31  | 0,04 ± 0,04  | 0,03 ± 0,06  | 0,03 ± 0,05  | 0,14 ± 0,09  | 0,17 ± 0,15  | 0,19 ± 0,12  | 0,15 ± 0,27  | 0,06 ± 0,05  | 0,02 ± 0,01  | 0,00 ± 0,00  | 0,00 ±       |              |              |              |              |              |              |              |

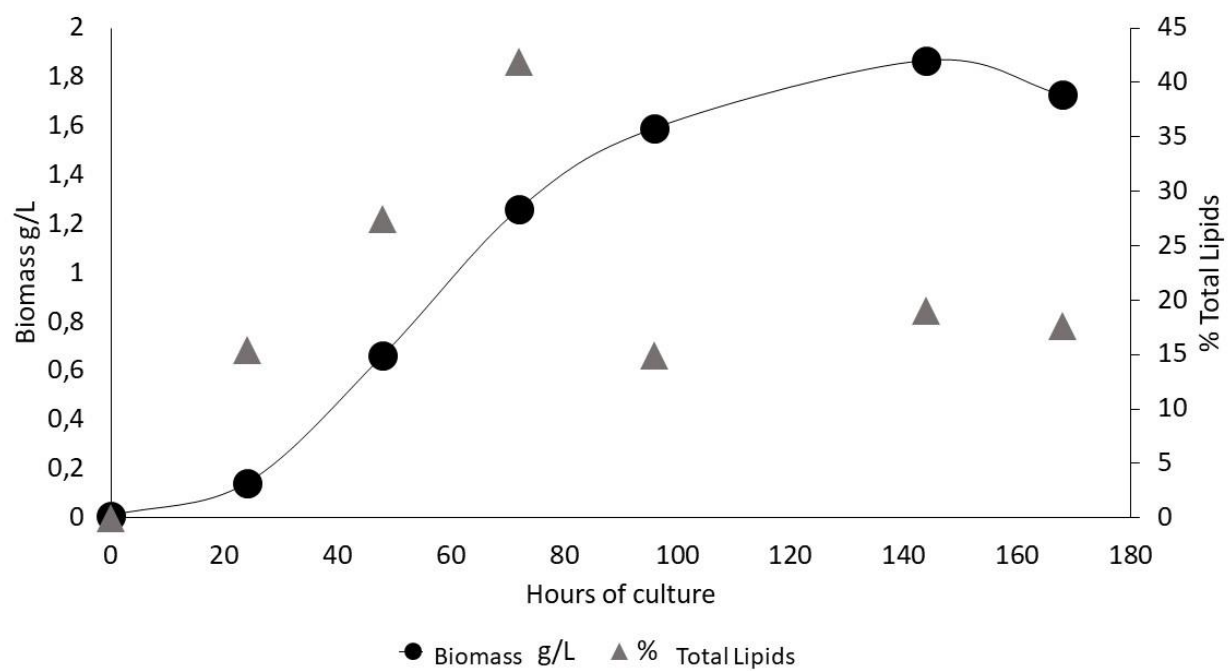

**Figure S1.** Growth kinetics of *Aurantiochytrium* sp. T66 in the 2673 medium and total lipids accumulation
